# Supplementary material for: Tetraspanin CD82 Correlates with and May Regulate S100A7 Expression in Oral Cancer
Source: MDPI journal article supplement (doi:10.3390/ijms25052659), 2024-02-24
Supplement: s1 [file s1]

# Title: Tetraspanin CD82 Correlates with and may Regulate S100A7 Expression in Oral Cancer

Kiran Kumar Reddi<sup>1</sup>, Weiqiang Zhang<sup>2,3,4</sup>, Shokoufeh Shahrabi-Farahani<sup>5</sup>, Kenneth Mark Anderson<sup>5</sup>, Mingyue Liu<sup>1</sup>, David Kakhniashvili<sup>6</sup>, Xusheng Wang<sup>7\*</sup>✉, and Yanhui H. Zhang<sup>1\*</sup>✉

## 1. Supplemental Table S1: Key Resources

| REAGENT or RESOURCE                                    | SOURCE                   | IDENTIFIER                                              |
|--------------------------------------------------------|--------------------------|---------------------------------------------------------|
| Antibodies                                             |                          |                                                         |
| Mouse monoclonal anti-Human CD82 (Clone TS82b)         | Cell sciences            | Cat# CDM457<br>Cat#857.790.000<br>, RRID:<br>AB_2076514 |
| Rabbit polyclonal anti-Human CD82                      | Abcam                    | Cat# ab66400;<br>RRID:<br>AB_1640343                    |
| Mouse monoclonal anti $\beta$ -Tubulin (Clone TUB 2.1) | Sigma-Aldrich            | Cat# T4026                                              |
| FITC goat anti-rabbit IgG                              | Sigma-Aldrich            | Cat# F0382                                              |
| FITC goat anti-mouse IgG                               | Sigma-Aldrich            | Cat# F2012                                              |
| Goat anti-rabbit IgG (H+L) Secondary Antibody, HRP     | Thermo Fisher Scientific | Cat# 65-6120<br>RRID:<br>AB_2533967                     |
| Goat anti-mouse IgG (H+L) Secondary Antibody, HRP      | Thermo Fisher Scientific | Cat# 31430,<br>RRID:<br>AB_228307                       |
| Mouse monoclonal anti-Human S100A7 (47C1068)           | Thermo Fisher Scientific | Cat# MA1-91555; RRID:<br>AB_2183976                     |
| Rabbit polyclonal anti-Human S100A6                    | Thermo Fisher Scientific | Cat# PA5-31862;<br>RRID:<br>AB_2549335                  |

|                                                                           |                                       |                                         |
|---------------------------------------------------------------------------|---------------------------------------|-----------------------------------------|
| Rabbit polyclonal anti-Human S100A8                                       | Thermo Fisher Scientific              | Cat# PA5-86063;<br>RRID:<br>AB_2802864  |
| Rabbit polyclonal anti-Human S100A7A                                      | Aviva Systems Biology                 | Cat#<br>OACD01125;<br>RRID:             |
| Rabbit polyclonal anti-Human S100A9                                       | Thermo Fisher Scientific              | Cat# PA1-46489;<br>RRID:<br>AB_10977234 |
| Normal Mouse IgG control                                                  | Santa Cruz                            | Cat# sc-2025;<br>RRID: AB_<br>737182    |
| Normal Rabbit IgG control                                                 | Cell Signaling Technology             | Cat# 2729S;<br>RRID: AB_<br>1031062     |
| Chemicals, Peptides, and Recombinant Proteins                             |                                       |                                         |
| Lipofectamine™ CRISPRMAX™ Cas9 Transfection Reagent                       | Invitrogen / Thermo Fisher Scientific | Cat#<br>CMAX00008                       |
| TrueCut™ Cas9 Protein v2                                                  | Invitrogen / Thermo Fisher Scientific | Cat# A36498                             |
| Prolonged gold anti-fade reagent with 4,6-diamidino-2-phenylindole (DAPI) | Invitrogen / Thermo Fisher Scientific | Cat# P36931                             |
| Western Lightning Plus-ECL Chemiluminescence reagent                      | Perkin Elmer                          | Cat#<br>NEL105001EA                     |
| Micro BCA Protein Assay Kit                                               | Thermo Fisher Scientific              | Cat# 23235                              |
| PMSF                                                                      | Sigma-Aldrich                         | Cat# 30976261                           |
| Triton X-100                                                              | Sigma-Aldrich                         | Cat# T8787                              |
| β-Glycerophosphate                                                        | Sigma-Aldrich                         | Cat# 9422                               |
| Sodium fluoride                                                           | Sigma-Aldrich                         | Cat# S7920                              |

|                                                                    |                                       |                  |
|--------------------------------------------------------------------|---------------------------------------|------------------|
| Sodium orthovanadate                                               | Sigma-Aldrich                         | Cat# 450243      |
| Tris-EDTA buffer pH 8                                              | Invitrogen / Thermo Fisher Scientific | Cat# AM9849      |
| 1M Tris pH 8                                                       | Invitrogen / Thermo Fisher Scientific | Cat# AM9856      |
| Pierce™ Mass Spec Sample Prep Kit for Cultured Cells               | Thermo Fisher Scientific              | Cat# 84840       |
| Thermo Scientific™ Pierce™ Quantitative Peptide Assays & Standards | Thermo Fisher Scientific              | Cat# 23275       |
| TMT Mass Tag Labeling reagent kit                                  | Thermo Fisher Scientific              | Cat# A34808      |
| Pierce High pH Reversed-Phase Peptide Fractionation kit            | Thermo Fisher Scientific              | Cat# 84868       |
| 4% Paraformaldehyde                                                | Santa Cruz                            | Cat# sc-281692   |
| 1M Tris/Glycine/SDS buffer                                         | Bio-Rad                               | Cat# 161-0772    |
| 1M Tris/Glycine buffer                                             | Bio-Rad                               | Cat# 161-0771    |
| Laemmli Sample Buffer                                              | Bio-Rad                               | Cat# 161-0747    |
| Precision Plus Protein Dual Color Standards                        | Bio-Rad                               | Cat# 161-0374    |
| Tween-20                                                           | Bio-Rad                               | Cat# 170-6531    |
| Sodium deoxycholate                                                | Sigma-Aldrich                         | Cat# D6750       |
| Non-Fat Dry Milk Blotting Grade Blocker                            | Bio-Rad                               | Cat# 170-6404    |
| EDTA-free complete protease cocktail inhibitor                     | Roche Molecular Systems               | Cat# 04693132001 |
| DMEM (1X) Liquid High Glucose, Pyruvate                            | Invitrogen/ Thermo Fisher Scientific  | Cat# 11995-065   |
| DMEM/F-12, HEPES                                                   | Invitrogen / Thermo Fisher Scientific | Cat# 11330-032   |

|                                                            |                                       |                                               |
|------------------------------------------------------------|---------------------------------------|-----------------------------------------------|
| Fetal Bovine Serum                                         | Invitrogen / Thermo Fisher Scientific | Cat# 10437-028                                |
| Goat Serum                                                 | Invitrogen / Thermo Fisher Scientific | Cat# 16210                                    |
| Penicillin-Streptomycin                                    | Invitrogen / Thermo Fisher Scientific | Cat# 15140-122                                |
| 0.25% Trypsin EDTA                                         | Invitrogen / Thermo Fisher Scientific | Cat# 25200-056                                |
| DPBS                                                       | Gibco/ Thermo Fisher Scientific       | Cat# 10010-023                                |
| Protein G sepharose 4 fast flow                            | GE-Healthcare                         | Cat# GE17-0618-01                             |
| Protein A sepharose CL-4B                                  | GE-Healthcare                         | Cat# GE17-0780-01                             |
| Critical Commercial Assays                                 |                                       |                                               |
| ultraView Universal DAB Detection Kit                      | Roche Diagnostics GmbH                | Cat# 760-500, RRID:AB_2753116                 |
| ultraView Universal Alkaline Phosphatase Red Detection Kit | Roche Diagnostics GmbH                | Cat# 760-501                                  |
| Deposited Data                                             |                                       |                                               |
|                                                            |                                       |                                               |
| Experimental Models: Cell Lines                            |                                       |                                               |
| Smulow-Glickman (S-G) human gingival epithelial cell line  | F.H. Kasten                           | [56,57]                                       |
| CAL 27 (Human squamous cell carcinoma, Epithelial)         | ATCC                                  | Cat# CRL-2095 <sup>TM</sup><br>RRID:CVCL_1107 |
| SCC-25 (Human Squamous cell carcinoma, Epithelial)         | ATCC                                  | Cat# CRL-1628 <sup>TM</sup><br>RRID:CVCL_1682 |
| Oligonucleotides                                           |                                       |                                               |

|                                                                                                                                                                                                                                                                                |                                                               |             |
|--------------------------------------------------------------------------------------------------------------------------------------------------------------------------------------------------------------------------------------------------------------------------------|---------------------------------------------------------------|-------------|
| CD82CHOP1 sgRNA (TrueGuide synthetic human CD82 sgRNA)<br>Target: GCCCATGTTGAAGTAGAAGAGGG<br>sgRNA: GCCCAUGUUGAAGUAGAAGA<br>Target locus Chr.11: 44615404 on GRCh38,<br>Strand -,<br>Targeted Isoform(s): NM_002231, isoform 1.                                                | Invitrogen /<br>Thermo Fisher<br>Scientific                   | Cat# A35513 |
| CD82 sgRNA<br>(TrueGuide™ synthetic human CD82 sgRNA)<br>Target: AGACTACAACAGCAGTCGCGAGG<br>sgRNA: AGACUACAACAGCAGUCGCGAGG<br>Target locus Chr.11: 44615313 on GRCh38,<br>Strand +,<br>Targeted Isoforms: NM_001024844.1,<br>NM_002231.3, XM_006718223.2,<br>XM_011520067.2. A | Invitrogen /<br>Thermo Fisher<br>Scientific                   | Cat# A35510 |
| TrueGuide™ human negative control,<br>sgRNA non-targeting 1                                                                                                                                                                                                                    | Invitrogen /<br>Thermo Fisher<br>Scientific                   | Cat# A35526 |
| CD82L gaaagcagaacccgcaga<br>CD82R ccagtgcagctggtcaca<br>Probe; 29                                                                                                                                                                                                              | Integrated DNA<br>technologies;<br>Roche Molecular<br>Systems |             |
| S100A7L ccaaacacacacatctcactca<br>S100A7R tcagcttgagtgttgctcatc<br>Probe; 33                                                                                                                                                                                                   | Integrated DNA<br>technologies;<br>Roche Molecular<br>Systems |             |
| S100A7AL tctcactcatccttctactcgtga<br>S100A7AR tcagcttgagtgttgctcatc<br>Probe; 48                                                                                                                                                                                               | Integrated DNA<br>technologies;<br>Roche Molecular<br>Systems |             |
| S100A6L actgcgacacagcccatc<br>S100A6R gaagatggccacgaggag<br>Probe; 23                                                                                                                                                                                                          | Integrated DNA<br>technologies;<br>Roche Molecular<br>Systems |             |
| S100A8L gccaaagcctaaccgctataa<br>S100A8R atgatgccacggacttg<br>Probe; 17                                                                                                                                                                                                        | Integrated DNA<br>technologies;<br>Roche Molecular<br>Systems |             |
| S100A9L gtgcgaaaagatctgcaaaa<br>S100A9R tcagctgctgtctgcattt<br>Probe; 85                                                                                                                                                                                                       | Integrated DNA<br>technologies;<br>Roche Molecular<br>Systems |             |

|                                             |                                                  |                                                                                                         |                                                                                                                                                                                                                                                                           |
|---------------------------------------------|--------------------------------------------------|---------------------------------------------------------------------------------------------------------|---------------------------------------------------------------------------------------------------------------------------------------------------------------------------------------------------------------------------------------------------------------------------|
| TUBB3L<br>TUBB3R<br>Probe                   | gcacacagaccggacaca<br>gaggcctcggttagtagacg<br>78 | Integrated DNA<br>technologies;<br>Roche Molecular<br>Systems                                           |                                                                                                                                                                                                                                                                           |
| Software and Algorithms                     |                                                  |                                                                                                         |                                                                                                                                                                                                                                                                           |
| CHOPCHOP web tool                           |                                                  | chopchop.rc.fas.harvard.edu;<br><a href="https://chopchop.cbu.uib.no/">https://chopchop.cbu.uib.no/</a> | [59,60]                                                                                                                                                                                                                                                                   |
| Excel 2016                                  |                                                  | Microsoft                                                                                               | <a href="https://www.office.com/">https://www.office.com/</a>                                                                                                                                                                                                             |
| ImageJ software                             |                                                  | <a href="https://imagej.nih.gov/ij/">https://imagej.nih.gov/ij/</a>                                     |                                                                                                                                                                                                                                                                           |
| Infinity analyze 3 6.5.5 software           |                                                  | Lumenera corporation,<br>Ottawa, ON                                                                     | <a href="https://www.lumenera.com/infinity-analyze-and-capture-for-windows.html">https://www.lumenera.com/infinity-analyze-and-capture-for-windows.html</a>                                                                                                               |
| Proteome Discoverer 2.2                     |                                                  | Thermo Fisher Scientific                                                                                | <a href="https://www.thermofisher.com/">https://www.thermofisher.com/</a>                                                                                                                                                                                                 |
| JUMP program                                |                                                  | <a href="https://github.com/JUMPSuite/JUMP">https://github.com/JUMPSuite/JUMP</a>                       | [65]                                                                                                                                                                                                                                                                      |
| ProbeFinder Assay Design Software           |                                                  | Roche Molecular Systems                                                                                 | <a href="https://lifescience.roche.com/en_us/articles/Universal-ProbeLibrary-System-Assay-Design.html">https://lifescience.roche.com/en_us/articles/Universal-ProbeLibrary-System-Assay-Design.html</a>                                                                   |
| SigmaPlot 12.5 software                     |                                                  | Systat Software, Inc                                                                                    | <a href="https://systatsoftware.com/">https://systatsoftware.com/</a>                                                                                                                                                                                                     |
| TrueDesign Genome Editor                    |                                                  | Thermo Fisher Scientific website                                                                        | <a href="https://www.thermofisher.com/us/en/home/life-science/genome-editing/geneart-crispr/geneart-crispr-search-and-design-tool.html">https://www.thermofisher.com/us/en/home/life-science/genome-editing/geneart-crispr/geneart-crispr-search-and-design-tool.html</a> |
| Zen Zeiss 2012 SP2 blue microscope software |                                                  | <a href="https://www.zeiss.com/corporate/us/home.html">https://www.zeiss.com/corporate/us/home.html</a> | <a href="https://www.zeiss.com/microscopy/us/products/microscope-software/zen-lite.html">https://www.zeiss.com/microscopy/us/products/microscope-software/zen-lite.html</a>                                                                                               |
